# Supplementary material for: Scalable synthesis of an environmentally benign graphene–sand based organic–inorganic hybrid for sulfide removal from aqueous solution: an insight into the mechanism
Source: Royal Society of Chemistry journal article supplement (doi:10.1039/c8nj05301d), 2019-01-01
Supplement: c8nj05301d1.pdf [file c8nj05301d1.pdf]

# ***Scalable synthesis of environmentally benign graphene-sand based organic-inorganic hybrid for sulfide removal from aqueous solution: an insight into the mechanism***

Anjali Achazhiyath Edathil, Jerina Hisham Zain\*, Mohammad Abu Haija , Fawzi Banat\*

*Department of Chemical Engineering, Khalifa University - SAN campus*

*Abu Dhabi, United Arab Emirates*

*\*Email of corresponding author: [jerina.zain@ku.ac.ae](mailto:jerina.zain@ku.ac.ae) ; [fawzi.banat@ku.ac.ae](mailto:fawzi.banat@ku.ac.ae)*

**Table S1.** Statistical analysis of the effect of pH on sulfide adsorption.

| <b>pH</b>                 | <b>2.82</b> | <b>4.12</b> | <b>5.64</b> | <b>6.04</b> | <b>7.58</b> | <b>9.18</b> | <b>10.21</b> | <b>11.06</b> | <b>12.06</b> |
|---------------------------|-------------|-------------|-------------|-------------|-------------|-------------|--------------|--------------|--------------|
| <b>% Removal</b>          | 100         | 100         | 99.8        | 99.8        | 99.6        | 99.8        | 100          | 99.6         | 100          |
|                           | 100         | 99.9        | 100         | 99.7        | 99.9        | 100         | 99.7         | 99.7         | 100          |
|                           | 99.8        | 99.8        | 99.9        | 100         | 100         | 99.8        | 99.9         | 100          | 99.9         |
| <b>Mean</b>               | 99.93       | 99.90       | 99.90       | 99.83       | 99.83       | 99.87       | 99.87        | 99.77        | 99.97        |
| <b>Variance</b>           | 0.01        | 0.01        | 0.01        | 0.02        | 0.04        | 0.01        | 0.02         | 0.04         | 0.00         |
| <b>Standard Deviation</b> | 0.12        | 0.10        | 0.10        | 0.15        | 0.21        | 0.12        | 0.15         | 0.21         | 0.06         |
| <b>Standard Error</b>     | 0.07        | 0.06        | 0.06        | 0.09        | 0.12        | 0.07        | 0.09         | 0.12         | 0.03         |
